# Supplementary material for: Effects of SiO2 Filler in the Shell and Wood Fiber in the Core on the Thermal Expansion of Core–Shell Wood/Polyethylene Composites
Source: MDPI journal article supplement (doi:10.3390/polym12112570), 2020-11-02
Supplement: s1 [file s1]

# Effects of SiO<sub>2</sub> filler in the shell and wood fiber in the core on the thermal expansion of core-shell wood/polyethylene composites

Lichao Sun <sup>a, b, c, 1</sup>, Haiyang Zhou <sup>a, c, 1</sup>, Guanggong Zong <sup>d</sup>, Rongxian Ou <sup>a, c</sup>, Qi Fan <sup>a, c</sup>, Junjie Xu <sup>a, c</sup>, Xiaolong Hao <sup>a, c, \*</sup>, Qiong Guo <sup>a, c, \*</sup>

<sup>a</sup> Key Laboratory for Biobased Materials and Energy of Ministry of Education, College of Materials and Energy, South China Agricultural University, 483 Wushan Road, Guangzhou 510642, P. R. China

<sup>b</sup> Key Laboratory of Bio-based Material Science and Technology (Ministry of Education), Northeast Forestry University, Harbin, Heilongjiang, 150040, China

<sup>c</sup> Guangdong Laboratory of Lingnan Modern Agriculture, Guangzhou, 510642, China

<sup>d</sup> Art and Design Institute, Yangzhou University, 88 Daxue South Road, Yangzhou 225009, P. R. China

<sup>1</sup> These authors contributed equally to this work.

\* Correspondence to: Xiaolong Hao, haoxiaolong@scau.edu.cn; Qiong Guo, email: guoqiong@scau.edu.cn

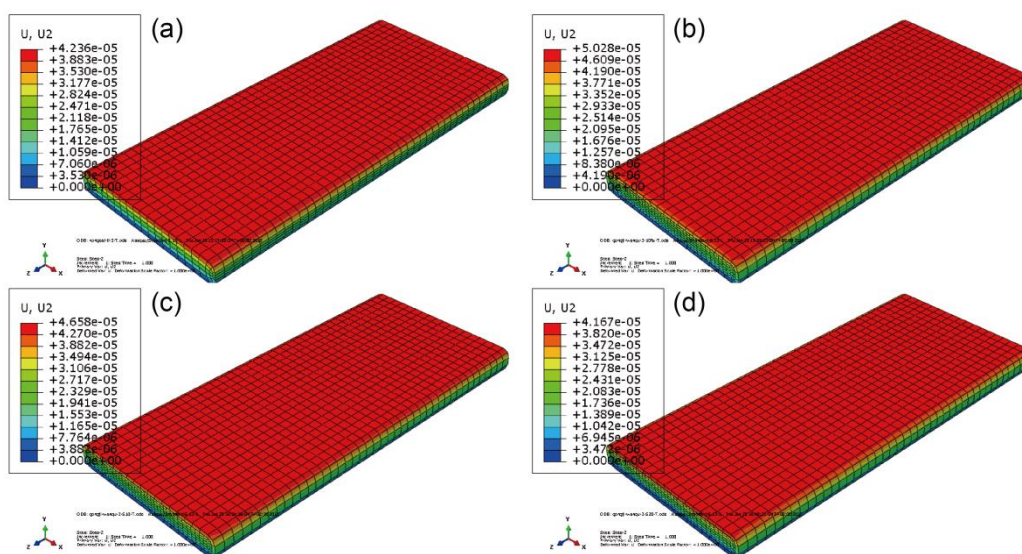

**FS. 1** Simulated thermal expansion strain values the entire Co-WPCs in the thickness direction: (a) single core layer (W50), (b) S0, (c) S10 and (d) S20.

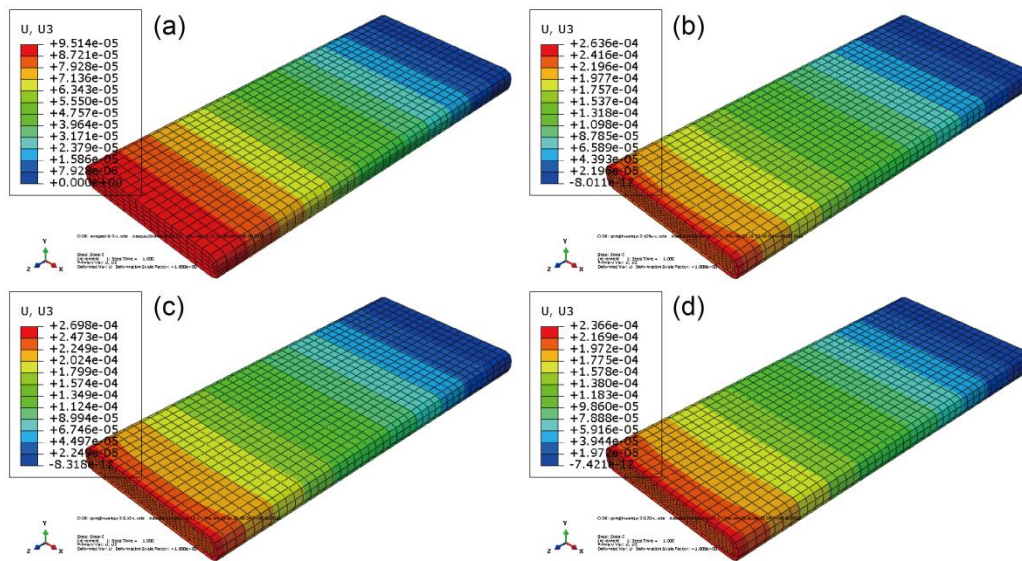

**FS. 2** Simulated thermal expansion strain values of the entire Co-WPCs in the extrusion direction: (a) single core layer (W50), (b) S0, (c) S10 and (d) S20.

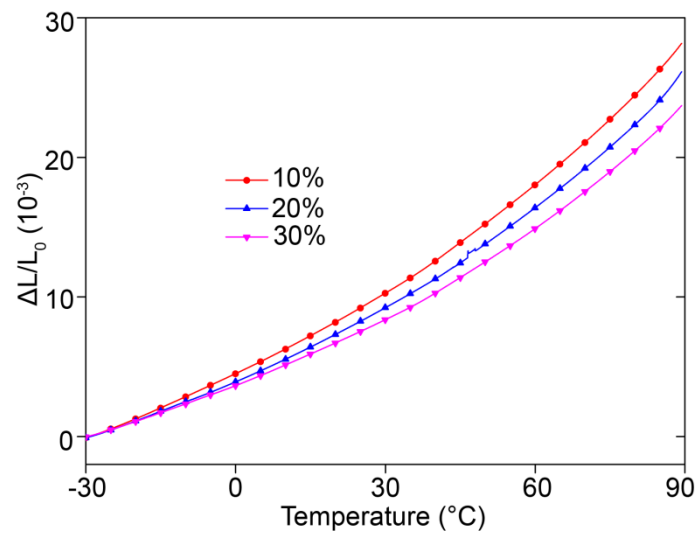

**FS. 3** Thermal expansion strain of the shell filling with different wood fiber contents.

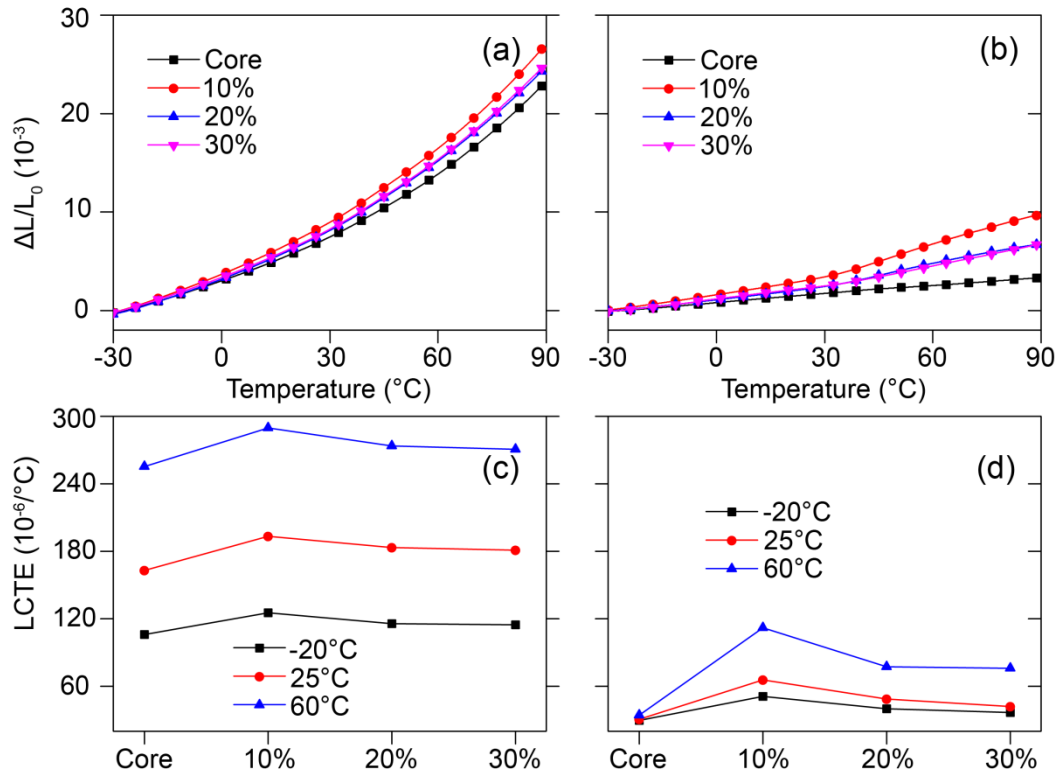

**FS. 4** Thermal expansion strain of the cut Co-WPCs (W50) filling with different wood fiber in shell layer in the thickness (a) and extrusion directions (b); and LCTE in thickness direction (c) and extrusion directions (d).

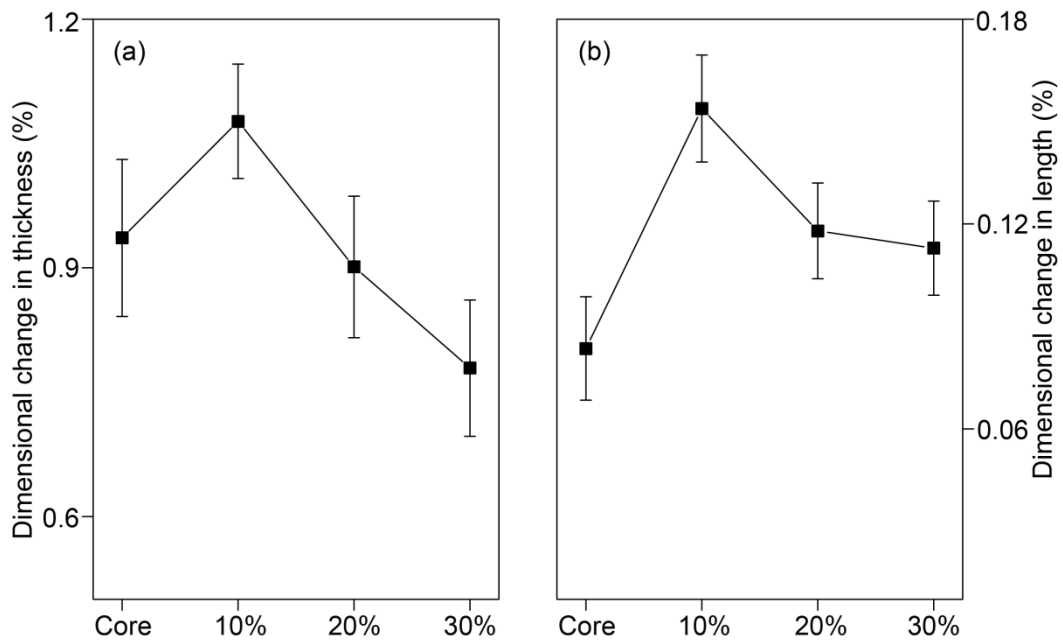

**FS. 5** Thermal expansion strain of the entire Co-WPCs (W50) filling with different wood fiber in shell layer in the thickness (a) and extrusion directions (b).
